# Supplementary material for: Genome-Wide Identification of RNA Editing Sites Affecting Muscle Development in Yak
Source: Frontiers journal article supplement (doi:10.3389/fvets.2022.871814), 2022-06-28
Supplement: Data_Sheet_1.PDF [file Data_Sheet_1.PDF]

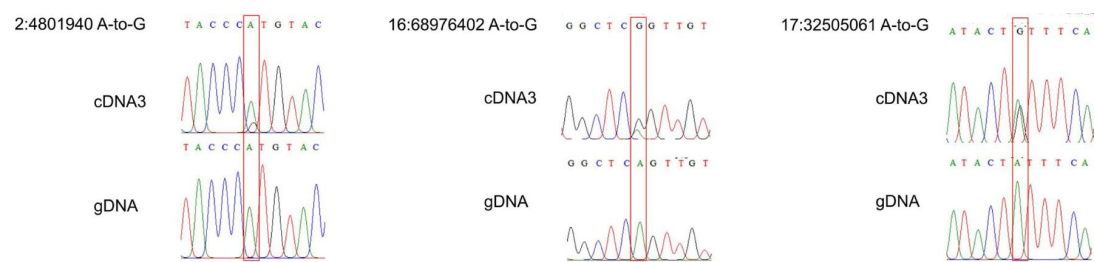

FIGURE S1 | Validation of RNA editing sites by PCR and Sanger sequencing

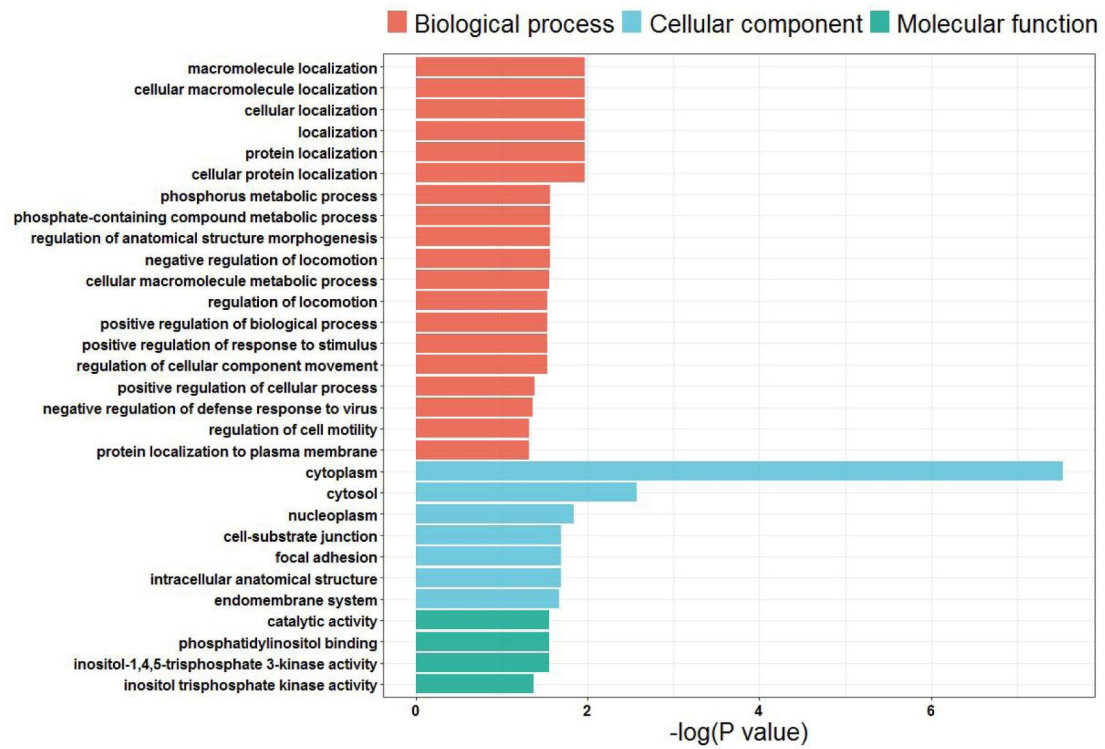

FIGURE S2 | GO enrichment of genes with modified miRNA binding sites.

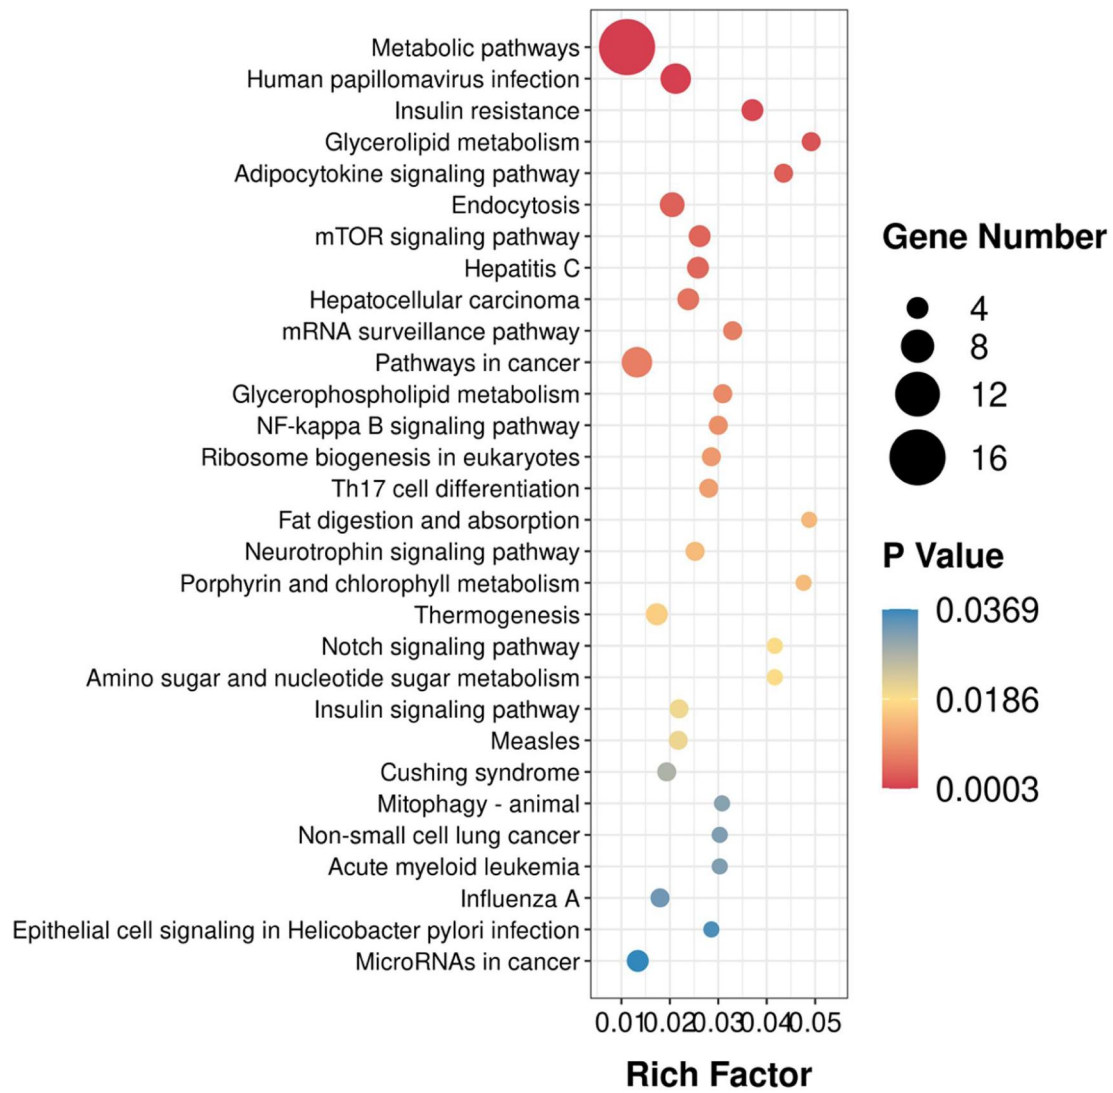

FIGURE S3 | KEGG enrichment of genes with modified miRNA binding sites.
